## **Functionnectome: a framework to analyse the contribution of brain circuits to fMRI**

Victor Nozais<sup>1,2\*</sup>, Stephanie J. Forkel<sup>1,2,3</sup>, Chris Foulon<sup>4</sup>, Laurent Petit<sup>1</sup>, Michel Thiebaut de Schotten<sup>1,2\*</sup>

<sup>1</sup>*Groupe d'Imagerie Neurofonctionnelle, Institut des Maladies Neurodégénératives-UMR 5293, CNRS, CEA, University of Bordeaux, Bordeaux, France*

<sup>2</sup>*Brain Connectivity and Behaviour Laboratory, Sorbonne Universities, Paris, France*

<sup>3</sup>*Centre for Neuroimaging Sciences, Department of Neuroimaging, Institute of Psychiatry, Psychology and Neuroscience, King's College London, London, UK*

<sup>4</sup>*Institute of Neurology, UCL, London WC1N 3BG, UK*

\*Corresponding authors: [victor.nozais@gmail.com](mailto:victor.nozais@gmail.com) ; [michel.thiebaut@gmail.com](mailto:michel.thiebaut@gmail.com)

## **Abstract**

In recent years, the field of functional neuroimaging has moved from a pure localisationist approach of isolated functional brain regions to a more integrated view of those regions within functional networks. The methods used to investigate such networks, however, rely on local signals in grey matter and are limited in identifying anatomical circuitries supporting the interaction between brain regions. Mapping the brain circuits mediating the functional signal between brain regions would propel forward our understanding of the brain's functional signatures and dysfunctions. We developed a novel method to unravel the relationship between brain circuits and functions: The Functionnectome. The Functionnectome combines the functional signal from fMRI with the anatomy of white matter brain circuits to unlock and chart the first maps of functional white matter. To showcase the versatility of this new method, we provide the first functional white matter maps revealing the joint contribution of connected areas to motor, working memory, and language functions. The Functionnectome comes with an open source companion software and opens new avenues into studying functional networks by applying the method to already existing dataset and beyond task fMRI.

## Introduction

Magnetic resonance imaging (MRI) has allowed peering inside the living human brain like never before <sup>1,2</sup>. In particular, functional MRI (fMRI) has allowed the investigation of the brain's dynamic activity, and revealed its functional architecture by contrasting the involvement of regions during tasks <sup>3</sup>.

While the classical fMRI approach was very fruitful <sup>4</sup>, the field of functional neuroimaging has recently moved away from a pure localisationist view of activated brain regions towards an interactive network approach identified with functional <sup>5,6</sup> and effective connectivity <sup>7</sup>. Functional connectivity consists in the coordinated activity of distant brain regions. The resulting brain maps reveal functional networks across brain regions that work in synchrony. However, functional connectivity does not offer any information about the causal relationship between these regions. Effective connectivity, on the other hand, uses a model of directional interaction between brain areas unmasking the modulatory effect some areas have on others within a functional cascade. These methods have demonstrated that the brain is functioning as an interconnected unity rather than a fractionated entity. Despite these advancements, both methods are limited in their ability to identify the anatomical circuits supporting the interaction between brain regions. Knowing the underlying structural substrates would be crucial, for instance, when the interaction between regions is significant but might be supported by an indirect anatomical network. This additional knowledge would have far-reaching implications on the functioning of the healthy brain and in the presence of brain damage. The anatomical circuits of the brain support its functioning<sup>8</sup> and are responsible for behavioural and cognitive disorders when impaired <sup>9-11</sup>. Historically, in the human brain, the anatomical circuitries have been explored through post-mortem white matter dissection <sup>12</sup>. Although dissections have enhanced our understanding of the physical connections between brain regions, its use remains limited as it can only be done in post mortem specimens, and requires laborious and inherently destructive procedures.

Advances in MRI facilitated the study of the in-vivo circuitry of the human brain using diffusion-weighted imaging tractography<sup>13</sup>. This method captures the local orientation of water diffusion<sup>14</sup>, which preferentially follows along the direction of axons within

the white matter. Tractography can provide an indirect measure of the axonal direction and can reconstruct bundles of axons (*i.e.* pathways). When applied to the entire brain, whole-brain tractograms can be computed and are commonly referred to as the structural connectome<sup>15</sup>. This non-invasive in-vivo method has been of tremendous help in mapping the anatomy of white matter<sup>16,17</sup> in healthy populations and has been successfully extended to clinical applications<sup>9,10,18</sup>. While tractography allows us to study the connections between brain regions, it does not inform us about their functions.

Preliminary evidence on the functional roles of white matter connections has thus far been inferred indirectly by mapping functional deficits on the white matter. This is typically achieved by mapping lesions onto the white matter and scrutinising the resulting functional deficits<sup>19</sup>. However, the scope of this approach is limited by the variability of the lesion topology, and the incomplete mapping of the brain areas contributing to function. Therefore, a method that can directly project fMRI on the white matter would be needed to shed light on the functional role of brain circuits.

Here we introduce a novel method and a software: the Functionnectome, that unlocks the function of the white matter. Functional white matter analysis is derived from the combination of task-related functional MRI and new anatomical priors for brain circuits. In doing so, we provide the first functional white matter maps revealing the joint contribution of connected areas to motor, working memory, and language functions. The Functionnectome is available as a companion open-source software (<https://github.com/NotaCS/Functionnectome>).

## Results

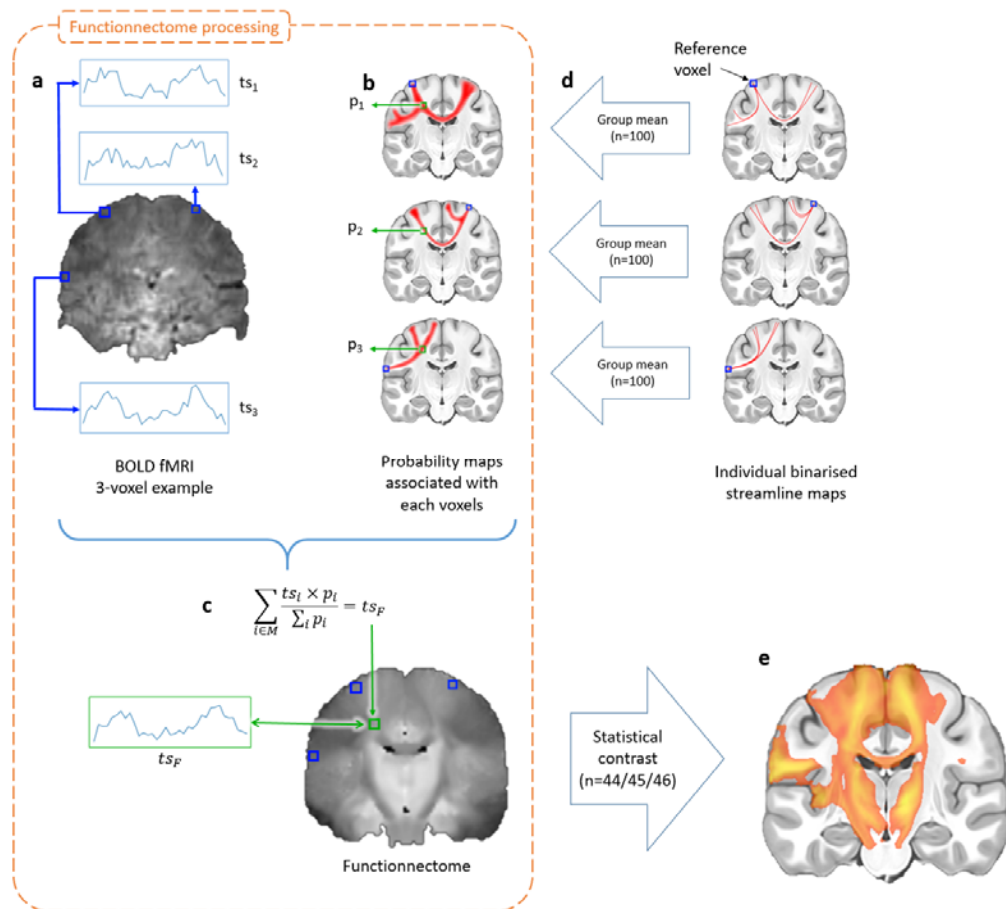

**Figure 1:** Experimental setup for the functionnectome. (a) Classical blood-oxygen-level-dependent functional magnetic resonance imaging (BOLD fMRI) in the cortex is projected onto the white matter circuits using (b) anatomical priors of the brain circuits and a (c) weighted average equation. The priors are derived from (d) 100 high-resolution diffusion weighted imaging dataset. The output of the functionnectome is subsequently entered (e) in the same statistical design as classical fMRI. M: mask used in the analysis; ts: time-series; p: probability of occurrence of a streamline.

In fMRI studies, patterns of task-based neural activation are classically derived from the statistical analysis of each voxel's time-course, usually using the general linear model (GLM) with the predicted hemodynamic response from the task. In order to evaluate the participation of white matter pathways in these tasks, we designed a new method, the Functionnectome, which combines the functional signal from

distant voxels of the classical fMRI 4D volume (Fig. 1a) using their probabilistic structural relationship given by anatomical priors of the involved brain circuits (Fig. 1b). These priors are probability maps derived from high resolution tractography (Fig. 1d). The resulting 4D volume, a “functionnectome” (Fig. 1c), can then be analysed with the usual statistical tools to reveal the activation patterns emerging from the signal (Fig. 1e). Here, we illustrated this process by applying the Functionnectome to motor (n=46), working memory (n=45), and language (n=44) functional volumes of the test-retest Human Connectome Project (HCP) dataset. Results from the functionnectome maps (a, c) are presented side by side with classical task activation analysis (b, d). The white matter “activations” displayed on the functionnectome z-maps correspond to significant involvement of the associated pathways during the task.

### Motor tasks

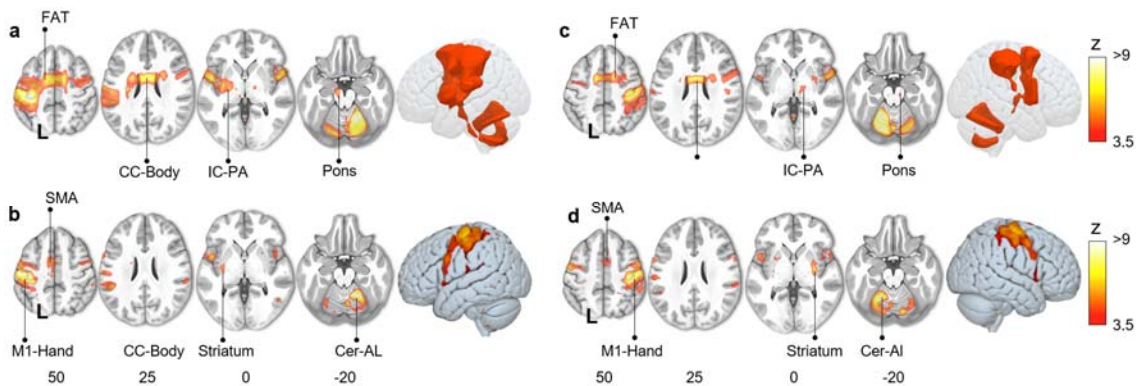

Figure 2: Motor task activation network for finger-tapping with the left (a: Functionnectome, b: classic) and right hand (c: Functionnectome, d: classic). FAT: Frontal Aslant Tract; CC-Body: Corpus Callosum body; M1: Primary motor cortex; SMA: Supplementary motor area; Cer-AL: Cerebellar anterior lobe; IC-PA: Internal capsule posterior arm.

The right finger tapping Functionnectome analysis (Figure 2a) revealed the well-established motor system circuit with significant involvement of the posterior arm of the left internal capsule, connections to subcortical areas and the cerebellum through the brain stem (*i.e.* pons). This activation was accompanied by an involvement of the frontal aslant tract (FAT) connecting the Supplementary motor area (SMA) with the frontal operculum and short u-shaped fibers around the hand area in the primary

motor cortex (M1) <sup>20</sup>. The joint contribution of both hemispheres to motor execution <sup>21</sup> was represented by the involvement of the body of the corpus callosum. In contrast, a classical fMRI analysis applied to the same data showed the involvement of the left motor hand area together with the SMA, and striatum as well as the right anterior lobe of the cerebellum (Figure 2b).

These results were elegantly mirrored by the Functionnectome and activation analyses for the left finger tapping task (Figure 2c-d).

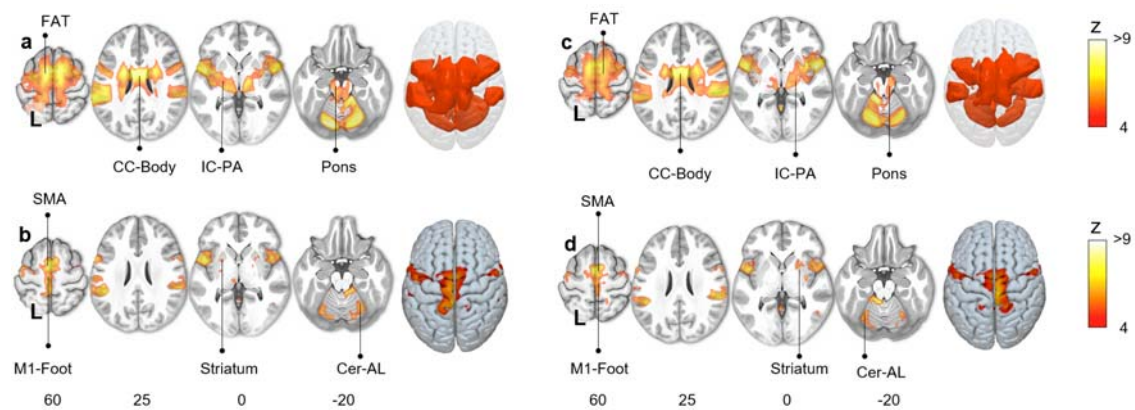

**Figure 3:** Motor task activation network for toe clenching with the left (a: Functionnectome, b: classic) and right foot (c: Functionnectome, d: classic). FAT: Frontal Aslant Tract; CC-Body: Corpus Callosum body; M1: Primary motor cortex; SMA: Supplementary motor area; Cer-AL: Cerebellar anterior lobe; IC-PA: Internal capsule posterior arm.

Similarly, the right foot motor activation task (clenching toes) Functionnectome analysis revealed the involvement of the frontal aslant tract, the corpus callosum, the internal capsule, and connections through the pons to the cerebellum (Figure 3a). Classical analyses showed significant activation of the left motor foot area with the SMA, striatum, and right anterior lobe of the cerebellum (Figure 3b).

A left-right flipped pattern of results was observed for the left foot motor task Functionnectome and classical analysis (Figure 3 c and d).

### *Visual working memory task*



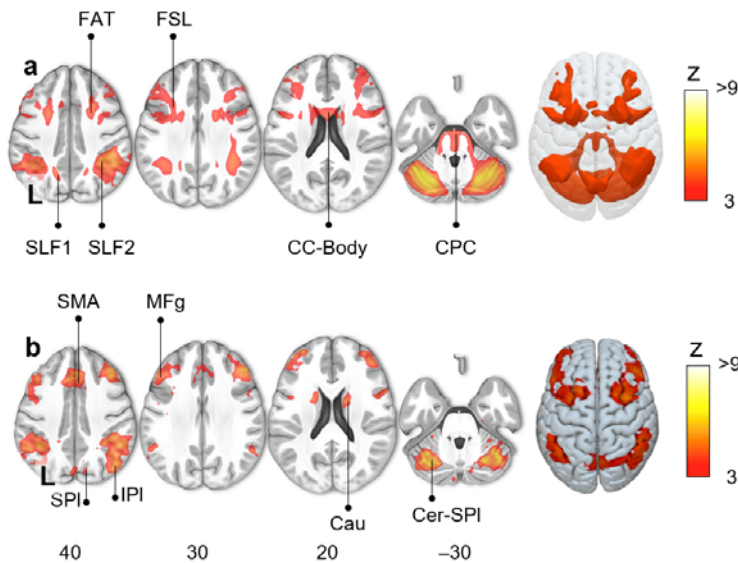

**Figure 4:** Working memory task activation network (a: Functionnectome, b: classic). FAT: Frontal Aslant Tract; FSL: Frontal Superior Longitudinal tract; SLF: Superior Longitudinal Fasciculus; CC-Body: Corpus Callosum body. CPC: Cortico-Ponto-Cerebellar tract; SMA: Supplementary Motor Area; SPL: Superior Parietal lobe; IPL: Inferior Parietal lobe; MFg: Middle frontal gyrus; Cau: Caudate nucleus; Cer-SPI: Superior Posterior lobe of the Cerebellum.

On the Functionnectome analysis maps, the working memory task revealed activation of cortico-cortical circuits necessary for the functional integration of the different involved areas<sup>22</sup> (Figure 4a). As such, the first and second branches of the superior longitudinal fasciculus (SLF 1, 2) were involved. This dorsal network is linking the superior and middle frontal gyri with the parietal lobe, which are both hubs of the working memory network. Likewise, U-shaped fibers, the frontal aslant tract and the frontal superior longitudinal tract<sup>23</sup> complete the network by connecting different regions within the frontal cortex and the SMA. We also observed the involvement of the corpus callosum, which facilitates interhemispheric integration required for working memory<sup>24</sup>.

In addition to cortico-cortical pathways, the cortico-ponto-cerebellar tract was also activated and connects the classical fMRI (Figure 4b) fronto-parietal working memory network with the cerebellum.

*Language (semantics)*



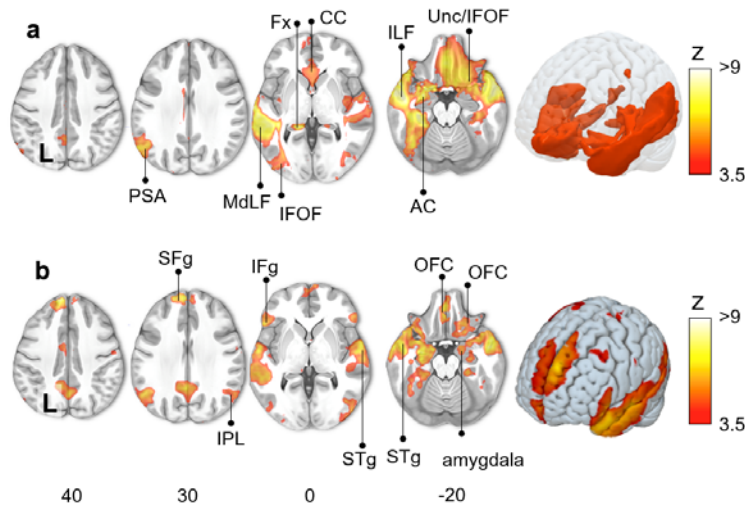

**Figure 5:** Semantic system task activation network (a: Functionnectome, b: classic).

PSA: Posterior Segment of the arcuate fasciculus; MdLF: Middle Longitudinal Fasciculus; IFOF: Inferior Fronto-Occipital Fasciculus; Fx: Fornix; CC: Corpus Callosum; ILF: Inferior Longitudinal Fasciculus; Unc: Uncinate fasciculus; AC: Anterior Commissure; SFg: Superior Frontal gyrus; IFg: Inferior Frontal gyrus; IPL: Inferior Parietal Lobe; STg: Superior Temporal gyrus; OFC: orbital frontal cortex; hipp: hippocampus.

The Functionnectome analysis for a language task (semantic) is displayed in Figure 5a and revealed the involvement of the language “ventral stream”. The ventral stream is composed of the uncinate and the inferior fronto-occipital fasciculus connecting the inferior frontal gyrus, and the temporal lobe, and the occipital lobe<sup>25,26</sup>. In addition, the analysis also showed the middle longitudinal fasciculus which links the temporal pole to the inferior parietal lobe<sup>27</sup> as well as the posterior segment of the arcuate fasciculus which links posterior temporal regions to the parietal lobe<sup>16</sup>. Both hemispheres could interact during the task thanks to the involvement of callosal connections. We also observed a significant involvement of the fornix during the task.

As expected, the classic fMRI maps displayed activation in the posterior inferior frontal gyrus, the superior temporal gyrus, and the inferior parietal lobe, forming the semantic network<sup>16,28</sup>. The anterior part of the temporal lobe was activated (Figure 5b), which is in line with the literature highlighting it as a central hub for semantic processing<sup>29</sup>. The orbitofrontal cortex has previously been linked to language and

semantic cognition<sup>29</sup>. Lastly, activation of the amygdala, mammillary bodies, and hippocampus reflects the involvement of a limbic network, integrating emotions with semantic memory<sup>30</sup>.

For each analysis reported above, we repeated the analysis in a replication dataset of the same participants (same session, opposite phase of acquisition). Table 1 indicates the reproducibility rate of the results. The Functionnectome results were systematically more reproducible ( $r = 0.82 \pm 0.06$ ) than the classical analysis ( $r = 0.72 \pm 0.05$ ).

|                 | Motor      |           |            |           | Memory  | Language  |
|-----------------|------------|-----------|------------|-----------|---------|-----------|
|                 | Right hand | Left hand | Right foot | Left foot | Working | Semantics |
| Functionnectome | 0.78       | 0.73      | 0.82       | 0.85      | 0.84    | 0.89      |
| Classical fMRI  | 0.71       | 0.68      | 0.70       | 0.72      | 0.70    | 0.83      |

Table 1: Reproducibility of the analysis maps for each task, for the Functionnectome and classical fMRI analyses. The reproducibility is indicated as Pearson's correlation coefficient  $r$ .

## Discussion

We propose a new method, the Functionnectome, to investigate the functional involvement of brain circuits during task-related cerebral processes. Applying our method to a high-quality functional neuroimaging dataset revealed - for the first time - the white matter circuits supporting motor, working memory, and language activations. Results also indicated a higher reproducibility of the Functionnectome maps compared to classical task-related activation methods suggesting that the functioning of the brain is mediated by interactions via anatomical circuits rather than the isolated contribution of brain regions. To support the broad uptake of this method and facilitate its application to a wide range of datasets, including in the clinic, we provide a GUI and terminal-based companion software. This toolbox allows the implementation of the Functionnectome to any previously acquired fMRI dataset and beyond. While the toolbox is flexible and users can integrate their own priors, the

current release and the high quality priors accompanying it open up novel avenues for research on the integrative function of white matter.

Obtaining significant activation of brain circuits with our method requires the functional involvement of the brain areas at both ends of this circuit. As first examples of such functional exploration of white matter, we investigated the brain circuits supporting prominent activation tasks including motor, memory and language functions. Our knowledge of the fine circuitry of the motor system is mostly derived from animal and lesion studies. The Functionnectome applied to motor tasks offer the unique opportunity to explore these circuits in the healthy human brain. In that regard, our findings match the pathways suggested by the literature and were replicated with both hands and feet twice. We confirmed the involvement of the internal capsule, which is a well established<sup>31</sup> part of the ascending and descending motor pathways that include the cortico-subcortical motor loops<sup>32,33</sup> and the cortico-cerebellar pathways. The latter has been long known to be part of the motor system<sup>34</sup>, with relays in subcortical nuclei, but has never been directly shown before. The cortico-ponto-cerebellar pathways<sup>35</sup> connect the primary motor cortex of one hemisphere with ipsilateral pontine nuclei and the contralateral anterior lobe of the cerebellum, passing through the internal capsule and the pons. The involvement of the corpus callosum in the motor tasks cannot be directly identified with fMRI but has long been considered essential to integrate the left and right motor systems<sup>36,37</sup>. The Functionnectome maps distinctly isolated these circuits.

Similarly, the patterns of white matter activation from the working memory task confirm and complement the literature. For example, the involvement of the superior longitudinal fasciculus reported with the Functionnectome has been well described<sup>38</sup>. Our results also confirm the importance of the cerebellum in working memory<sup>35,39</sup> but extend this insight by mapping the full circuitry supporting its involvement. Similarly, the fronto-frontal tracts involvement in the working memory Functionnectome supports the hypothesis of the frontal lobe working memory hierarchically<sup>8,20,40</sup>. Additionally, classical working memory activation tasks<sup>41</sup> and clinical studies<sup>24</sup> unveiled the importance of both hemispheres for working memory, but researchers could only speculate about the underlying anatomical circuitry. Here, the Functionnectome revealed the exact portion of the corpus callosum that integrates bilateral contribution to working memory.

The language circuitry, and more so its semantic system, offers an even greater challenge as it cannot be explored in animal studies<sup>26</sup>. The Functionnectome confirmed, for the first time in the healthy human brain, the structural-functional circuitry supporting semantic processes originally suggested by lesion studies<sup>25</sup> or intraoperative stimulation<sup>26</sup> in humans (i.e. the uncinate fasciculus, the inferior fronto-occipital fasciculus, the middle longitudinal fasciculus, and the posterior segment of the arcuate fasciculus). The Functionnectome also revealed the involvement of the anterior corpus callosum in story comprehension. Whilst some language processes require the integration of the left and right hemispheres via the posterior corpus callosum<sup>42</sup>, the anterior corpus callosum has been implicated in semantic disorders (e.g. semantic dementia)<sup>43</sup>. The Functionnectome result also suggests an involvement of the fornix. As a limbic pathway, it may play an important role in the colouring of the story comprehension with emotions and memories<sup>30</sup>. Our results thus prompt a closer inquiry into the role of the anterior corpus callosum and fornix in semantic processes and offer a non-invasive tool to study its involvement in healthy participants. In sum, our application of the Functionnectome to classical fMRI allows the confirmation and the exploration of the involvement of circuits for specific tasks for the first time in the healthy human brain.

As reproducibility of findings is at utmost importance in science<sup>44</sup> we verified whether our activation maps were consistent across different acquisitions. The replication of our analysis confirmed the high reproducibility of the results highlighted by our method. Importantly, the Functionnectome results were more reproducible than classical task-related activation methods. While the two methods are not identical and not perfectly comparable with regards to filtering, the observed differences also emerge from the fact that they rely on different assumptions for the assessment of the functioning of the brain. While classical fMRI computes differences between regions of the brain independently, the Functionnectome associates their circuits to brain function. Higher reproducibility for the Functionnectome would then suggest that the functioning of the brain is mediated by interactions via anatomical circuits rather than the isolated contribution of brain regions.

To upscale the validation of this network view of brain functioning, crowdsource analysis of additional data is possible. In this regard, we provide an open-source software that will allow easy application of the Functionnectome method

to revisit already acquired fMRI datasets, either private or publicly available (e.g. HCP<sup>45</sup>, UK Biobank<sup>46</sup>, ABIDE<sup>47</sup>). The use of the Functionnectome is also not bound to the activation paradigm and can be combined with advanced fMRI statistics<sup>7</sup> to reveal the dynamic causal interaction between brain circuits. Additionally, the Functionnectome can leverage the wealth of MRI modalities to explore the involvement of white matter circuits in different aspects of brain dynamics. For example, it could be applied to resting-state functional connectivity or cortical thickness to open up new perspectives in the study of functional synchronisation, cortical changes during development, and brain pathologies.

The Functionnectome is a new and promising method that relies on anatomical priors to determine how to project the functional signal onto the white matter. The current best way to obtain a complete 3D map of the white matter pathways in the living human brain is tractography. Although this method has been successfully applied to explore the relationship between white matter structure, and brain functions and dysfunctions<sup>10,16</sup>, tractography is still facing limitations<sup>48</sup>. Nonetheless, great progress has been made towards the resolution of these problems in the last decade<sup>13</sup>. Future developments in this area will likely improve upon the quality of current tractograms. These improvements will be implemented in the Functionnectome as priors can easily be replaced (see supplementary material) in the future to incorporate novel advances in tractography. Similarly, although we provide high-quality anatomical priors based on best white matter mapping derived from the Human Connectome Project 7T<sup>49</sup> in the software, other research teams are welcome to use homemade priors. Future developments of the priors might include a separation in interhemispheric (i.e. commissural circuits), cortico-subcortical (i.e. projection circuits) and cortico-cortical connectivity (i.e. association circuits) to better disentangle brain circuitries.

Finally, the computation of the Functionnectome using every brain voxel can be very computationally expensive and thus time-consuming. While we recommend using this procedure, we acknowledge that not all research teams have access to the computing power required to compute the “voxel-wise” Functionnectome of several subjects in a reasonable amount of time. To circumvent this potential constraint, we provide an option within the software allowing the use of an atlas and its parcels instead of all voxels, for a less computationally intensive “region-wise” analysis. The anatomical priors come with this alternative option using the recently

published multimodal parcellation atlas<sup>50</sup>, should you choose to use this option (see supplementary materials).

Overall, we introduced and demonstrated the potential of the Functionnectome method, opening the field of in-vivo study of the function of white matter in healthy humans. In this context, the Functionnectome promotes a paradigm shift in the study of the brain, focusing on the interaction of brain regions in the support of a brain function, rather than the fractionated contribution of independent regions.

## Methods

The following workflow was summarised in Figure 6.

### *Datasets*

Two datasets derived from the Human Connectome Project<sup>45</sup> (HCP) were used for the study, and are publicly available: the 7T diffusion-weighted imaging (DWI) data used to generate the tractography priors (subset of 100 subjects; available at <https://osf.io/5zqwg/> and <http://www.bcblab.com/BCB/Opendata.html>), and the 3T task-based fMRI acquisitions (46 subjects, test-rest dataset)

### *Acquisition parameters and preprocessing*

EPI acquisitions: Full description of the acquisition parameters have been described elsewhere<sup>51</sup>. In brief, the data were acquired on a 3 Tesla Siemens Skyra scanner using a whole-brain EPI acquisition with a 32 channel head coil. The parameters were as follows: TE = 33.1 ms, TR = 720 ms, flip angle = 52°, BW = 2290 Hz/Px, in-plane FOV = 208 × 180 mm, 72 slices, 2.0 mm isotropic voxels, and a multi-band acceleration factor of 8. Each task was acquired twice using a right-to-left and a left-to-right phase encoding. The EPI 4D acquisitions were then preprocessed through the “Minimal preprocessing pipeline” *fMRIVolume*<sup>52</sup>, which applies movement and distortion corrections and performs a registration to the MNI152 space.

### *DWI acquisitions and tractography*

Structural connectome data were downloaded here (subset of 100 subjects; available at <https://osf.io/5zqwg/> and <http://www.bcblab.com/BCB/Opendata.html>) This dataset was derived from the diffusion-weighted imaging dataset of 100 participants acquired at 7 Tesla by the Human Connectome Project Team<sup>49</sup> (<http://www.humanconnectome.org/study/hcp-young-adult/>; WU-Minn Consortium; Principal investigators: David Van Essen and Kamil Ugurbil; 1U54MH091657). This was funded by the 16 NIH Institutes and Centers that support the NIH Blueprint for Neuroscience Research, and by the McDonnell Center for Systems Neuroscience at Washington University.



The scanning parameters have previously been described in <sup>49</sup>. In brief, each diffusion-weighted imaging consisted of a total of 132 near-axial slices acquired with an acceleration factor of 3 <sup>53</sup>, isotropic (1.05 mm<sup>3</sup>) resolution and coverage of the whole head with a TE of 71.2 ms and with a TR of 7000 ms. At each slice location, diffusion-weighted images were acquired with 65 uniformly distributed gradients in multiple Q-space shells <sup>54</sup> and 6 images with no diffusion gradient applied. This acquisition was repeated four times with a b-value of 1000 and 2000 s mm<sup>-2</sup> in pairs with anterior-to-posterior and posterior-to-anterior phase-encoding directions. The default HCP preprocessing pipeline (v3.19.0) <sup>52</sup> was applied to the data <sup>55</sup>. In short, the susceptibility-induced off-resonance field was estimated from pairs of images with diffusion gradient applied with distortions going in opposite directions <sup>56</sup> and corrected for the whole diffusion-weighted dataset using TOPUP <sup>57</sup>. Subsequently, motion and geometrical distortion were corrected using the EDDY tool as implemented in FSL.

Next, we discarded the volumes with a b-value of 1000 s/mm<sup>-2</sup> and whole-brain deterministic tractography was subsequently performed in the native DWI space using StarTrack software (<https://www.mr-startrack.com>). A damped Richardson-Lucy algorithm was applied for spherical deconvolutions <sup>57,58</sup>. A fixed fibre response corresponding to a shape factor of  $\alpha = 1.5 \times 10^{-3}$  mm<sup>2</sup> s<sup>-1</sup> was adopted, coupled with the geometric damping parameter of 8. Two hundred algorithm iterations were run. The absolute threshold was defined as three times the spherical fibre orientation distribution (FOD) of a grey matter isotropic voxel and the relative threshold as 8% of the maximum amplitude of the FOD <sup>59</sup>. A modified Euler algorithm <sup>60</sup> was used to perform the whole-brain streamline tractography, with an angle threshold of 35°, a step size of 0.5 mm and a minimum streamline length of 15 mm.

We co-registered the structural connectome data to the standard MNI 2 mm space using the following steps: first, whole-brain streamline tractography was converted into streamline density volumes where the intensities corresponded to the number of streamlines crossing each voxel. Second, a study-specific template of streamline density volumes was generated using the Greedy symmetric diffeomorphic normalisation (GreedySyN) pipeline distributed with ANTs <sup>60,61</sup>. This provided an average template of the streamline density volumes for all subjects. The template

was then co-registered with a standard 2 mm MNI152 template using flirt as implemented in FSL. This step produced a streamline density template in the MNI152 space. Third, individual streamline density volumes were registered to the streamline density template in the MNI152 space template and the same transformation was applied to the individual whole-brain streamline tractography using the trackmath tool distributed with the software package Tract Querier<sup>62</sup> using ANTs GreedySyn. This step produced a whole-brain streamline tractography in the standard MNI152 space.

### *Tractogram-derived anatomical priors*

Our method projects the functional signal to white matter structures. To do so, knowledge of the underlying brain circuits is required. For each voxel of the brain, we produced a map indicating the brain circuits probability. This probability corresponds to the probability of connections derived from a normative population of 100 HCP participants. Specifically, for each voxel, all streamlines intersecting in this specific voxel were derived from tractograms, binarised and averaged across subjects, using a function similar to the “Disconnectome” function of the BCBtoolkit<sup>63</sup>. Thus, each map has voxel values between 0 and 1, representing the probability of the presence of a streamline.

These probability maps serve as the anatomical priors for brain circuits. As part of the toolbox the priors can be adjusted in the future.

### *Functionnectome pre-processing*

The Functionnectome method projects the BOLD signal obtained for each voxel onto the white matter passing through a voxel. Practically, the algorithm can be broken down in a few steps:

For each subject, the Functionnectome was provided with a mask selecting the voxels whose functional signal will be projected onto the white matter. Here we used the masks available from the HCP that excluded noisy voxels. These masks exclude voxels with a high coefficient of variation, i.e. higher than 0.5 standard deviations compared to neighbouring voxels (saved by the HCP pipeline in the file “RibbonVolumeToSurfaceMapping/goodvoxels.nii.gz”).

Next, the time-series was extracted for each voxel and multiplied with its associated probability map. In doing so the functional signal is projected on the white matter, and weighted by the probability of the presence of a streamline, resulting in one 4D volume per voxel. All 4D volumes are subsequently fused together by voxel-wise addition and divided by the sum of all probability maps to produce a weighted average of the voxel-wise 4D volumes. This final step ensures that all voxels have a comparable range of values (equivalent to the range of values of the BOLD signal). The final output of the algorithm is a functionnectome 4D volume.

The value of a given voxel  $v$  at a given time-point  $t$  in the functionnectome can thus be described with the following equation:

$$\text{Functionnectome}(v, t) = \sum_{m \in M} \frac{P_m(v) \times F(m, t)}{\sum_{m \in M} P_m(v)}$$

With  $M$  the set of voxels selected by the input mask;  $P_m$  the probability map derived from the voxel  $m$ ; and  $F$  the original fMRI 4D volume.

### *Functional data pre-processing*

To compare our method with standard analyses, we explored the activation patterns of HCP fMRI paradigms for motor (n=46), working memory (n=45), and language (n=44) tasks (see <https://protocols.humanconnectome.org/HCP/3T/task-fMRI-protocol-details.html> and <sup>64</sup> for a full description of the tasks protocol). Briefly, the motor tasks consisted of finger tapping (left or right hand) and toes clenching (left or right foot); the working memory task was a 2-back task; and the language task corresponded to the comparison of comprehension of high and low semantic content (stories, math problems).

### *Processing of neuroimaging data*

The activation analysis was applied to both the original functional dataset and the functionnectome 4D volumes. Processing was identical except for the application of a traditional spatial smoothing (FWHM = 4 mm) on the functional dataset (i.e. as a usual step to improve the signal/noise ratio and misalignment). Specifically, no spatial smoothing is required for the functionnectomes 4D volumes. Usual smoothing aims at improving the signal/noise ratio (SNR) using a weighted average of the local signal, assuming that neighbouring voxels share some signal of interest. The Functionnectome method combines the signal from distant yet structurally linked

voxels, which has an analogous effect of improving the SNR, but is guided by actual brain circuits.

The processing was done using FEAT (fMRI Expert Analysis Tool, v6.00) from FSL (FMRIB's Software Library). First-level statistical analysis was carried out on each participant using FILM (FMRIB's Improved Linear Model)<sup>65</sup> with prewhitening. For each task, we used the main contrasts provided with the HCP dataset. Then, a group-level analysis was performed on all participants using the first stage of FLAME (FMRIB's Local Analysis of Mixed Effects)<sup>66</sup>, resulting in the z-maps (z-transformed t-maps) presented in the results (fig. 1-4).

### *Additional statistics (replication)*

To test the reproducibility of our results, we used the two acquisitions realised for each subject: one with a left-right encoding phase, the other with a right-left encoding phase. We compared the z-maps resulting from the full processing of these two acquisitions using Pearson's correlation coefficient (excluding voxels outside the brain).

### *Visualisation*

Functional z maps and functionectome maps were displayed on a standard template in MRICron (<https://www.nitrc.org/projects/mricron>). Labelling for cortical regions and white matter pathways were added manually by expert anatomists (SJF and MTS). The visualisation of 3D structures in 2D is limited and may appear ambiguous at times but the full trajectories of pathways were considered before labelling, especially in regions of overlap between white matter structures. The 3D renderings were generated using the associated z-map.

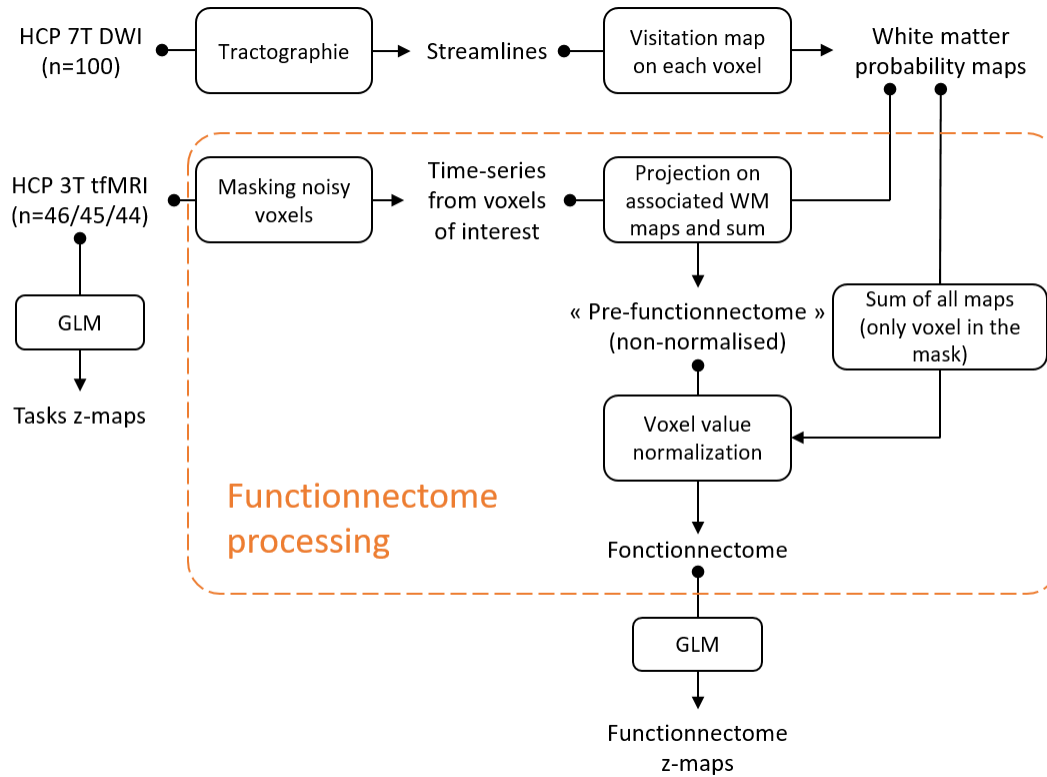

**Figure 6:** Flowchart of methods pipeline

## **Acknowledgements**

We thank University of Bordeaux and CNRS for the infrastructural support. This project has received funding from the European Research Council (ERC) under the European Union's Horizon 2020 research and innovation programme (grant agreement No. 818521).

## **Authors contribution statement**

V.N. implemented the methods, performed the analyses, wrote the manuscript. S.J.F wrote the manuscript and reviewed the neuroimaging data. C.F. conceived the study, implemented part of the methods and revised the manuscript. L.P. reviewed the neuroimaging data and revised the manuscript. M.T.S. conceived and coordinated the study, implemented the methods, performed the analyses, wrote the manuscript and provided funding.

## **Competing interest**

The authors declare no competing of interest.

## **Data availability**

All the raw anatomical and functional data are available on the HCP website.

<https://www.humanconnectome.org>

## **Code availability**

The functionnectomes and the associated maps are available on demand to the authors. The python compatible algorithm (version 3.6 or higher) for the Functionnectome analysis is freely available and comes with an optional GUI code (<https://github.com/NotaCS/Functionnectome>).

## References

1. Lerch, J. P. *et al.* Studying neuroanatomy using MRI. *Nat. Neurosci.* **20**, 314–326 (2017).
2. Twenty years of functional MRI: The science and the stories. *Neuroimage* **62**, 575–588 (2012).
3. Ogawa, S., Lee, T. M., Kay, A. R. & Tank, D. W. Brain magnetic resonance imaging with contrast dependent on blood oxygenation. *Proc. Natl. Acad. Sci. U. S. A.* **87**, 9868–9872 (1990).
4. Yarkoni, T., Poldrack, R. A., Nichols, T. E., Van Essen, D. C. & Wager, T. D. Large-scale automated synthesis of human functional neuroimaging data. *Nat. Methods* **8**, 665–670 (2011).
5. Biswal, B., Zerrin Yetkin, F., Haughton, V. M. & Hyde, J. S. Functional connectivity in the motor cortex of resting human brain using echo-planar mri. *Magn. Reson. Med.* **34**, 537–541 (1995).
6. Fox, M. D. *et al.* The human brain is intrinsically organized into dynamic, anticorrelated functional networks. *Proc. Natl. Acad. Sci. U. S. A.* **102**, 9673–9678 (2005).
7. Friston, K. J., Frith, C. D., Liddle, P. F. & Frackowiak, R. S. J. Functional Connectivity: The Principal-Component Analysis of Large (PET) Data Sets. *J. Cereb. Blood Flow Metab.* **13**, 5–14 (1993).
8. Thiebaut de Schotten, M. *et al.* Rostro-caudal Architecture of the Frontal Lobes in Humans. *Cereb. Cortex* **27**, 4033–4047 (2017).
9. Thiebaut de Schotten, M. *et al.* Direct evidence for a parietal-frontal pathway subserving spatial awareness in humans. *Science* **309**, 2226–2228 (2005).
10. Forkel, S. J. *et al.* Anatomical predictors of aphasia recovery: a tractography study of bilateral perisylvian language networks. *Brain* **137**, 2027–2039 (2014).
11. de Groot, J. C. *et al.* Cerebral white matter lesions and subjective cognitive dysfunction: The Rotterdam Scan Study. *Neurology* **56**, 1539–1545 (2001).
12. Ludwig, E. & Klingler, J. *Atlas Cerebri Humani: Der Innere Bau Des Gehirns.* (1956).
13. Jeurissen, B., Descoteaux, M., Mori, S. & Leemans, A. Diffusion MRI fiber tractography of the brain. *NMR Biomed.* **32**, e3785 (2019).
14. Stejskal, E. O. & Tanner, J. E. Spin Diffusion Measurements: Spin Echoes in the Presence of a Time-Dependent Field Gradient. *J. Chem. Phys.* **42**, 288–292 (1965).
15. Sporns, O. *Networks of the Brain.* (2010) doi:10.7551/mitpress/8476.001.0001.
16. Catani, M. & de Schotten, M. T. *Atlas of Human Brain Connections.* (2012) doi:10.1093/med/9780199541164.001.0001.
17. Oishi, K., Faria, A. V., van Zijl, P. C. M. & Mori, S. *MRI Atlas of Human White Matter.* (Academic Press, 2010).
18. Riva-Posse, P. *et al.* A connectomic approach for subcallosal cingulate deep brain stimulation surgery: prospective targeting in treatment-resistant depression. *Mol. Psychiatry* **23**, 843–849 (2017).
19. de Schotten, M. T., Foulon, C. & Nachev, P. Brain disconnections link structural connectivity with function and behaviour. *Nat. Commun.* **11**, 1–8 (2020).
20. Catani, M. *et al.* Short frontal lobe connections of the human brain. *Cortex* **48**, 273–291 (2012).
21. Perez, M. A. & Cohen, L. G. Mechanisms Underlying Functional Changes in the Primary Motor Cortex Ipsilateral to an Active Hand. *Journal of Neuroscience* **28**, 5631–5640 (2008).
22. Olesen, P. J., Westerberg, H. & Klingberg, T. Increased prefrontal and parietal activity after training of working memory. *Nat. Neurosci.* **7**, 75–79 (2003).
23. Rojkova, K. *et al.* Atlasing the frontal lobe connections and their variability due to age and education: a spherical deconvolution tractography study. *Brain Struct. Funct.* **221**, 1751–1766 (2016).
24. Blackmon, K. *et al.* The corpus callosum and recovery of working memory after epilepsy



- surgery. *Epilepsia* **56**, 527–534 (2015).
25. Almairac, F., Herbet, G., Moritz-Gasser, S., de Champfleury, N. M. & Duffau, H. The left inferior fronto-occipital fasciculus subserves language semantics: a multilevel lesion study. *Brain Struct. Funct.* **220**, 1983–1995 (2015).
  26. Duffau, H. *et al.* New insights into the anatomo-functional connectivity of the semantic system: a study using cortico-subcortical electrostimulations. *Brain* **128**, 797–810 (2005).
  27. Menjot de Champfleury, N. *et al.* Middle longitudinal fasciculus delineation within language pathways: A diffusion tensor imaging study in human. *Eur. J. Radiol.* **82**, 151–157 (2013).
  28. Meta-analyzing left hemisphere language areas: Phonology, semantics, and sentence processing. *Neuroimage* **30**, 1414–1432 (2006).
  29. Jackson, R. L., Hoffman, P., Pobric, G. & Lambon Ralph, M. A. The Semantic Network at Work and Rest: Differential Connectivity of Anterior Temporal Lobe Subregions. *J. Neurosci.* **36**, 1490–1501 (2016).
  30. A revised limbic system model for memory, emotion and behaviour. *Neurosci. Biobehav. Rev.* **37**, 1724–1737 (2013).
  31. Fries, W., Danek, A., Scheidtmann, K. & Hamburger, C. Motor recovery following capsular stroke. Role of descending pathways from multiple motor areas. *Brain* **116** ( Pt 2), 369–382 (1993).
  32. Haber, S. N. & Calzavara, R. The cortico-basal ganglia integrative network: The role of the thalamus. *Brain Res. Bull.* **78**, 69–74 (2009).
  33. Schmahmann, J. D. & Pandya, D. N. Fiber Pathways of the Brain. (2006) doi:10.1093/acprof:oso/9780195104233.001.0001.
  34. Evarts, E. V. & Thach, W. T. Motor Mechanisms of the CNS: Cerebrocerebellar Interrelations. *Annu. Rev. Physiol.* **31**, 451–498 (1969).
  35. Ramnani, N. The primate cortico-cerebellar system: anatomy and function. *Nat. Rev. Neurosci.* **7**, 511–522 (2006).
  36. Meyer, B.-U., Röricht, S., von Einsiedel, H. G., Kruggel, F. & Weindl, A. Inhibitory and excitatory interhemispheric transfers between motor cortical areas in normal humans and patients with abnormalities of the corpus callosum. *Brain* **118**, 429–440 (1995).
  37. Gould, H. J., Cusick, C. G., Pons, T. P. & Kaas, J. H. The relationship of corpus callosum connections to electrical stimulation maps of motor, supplementary motor, and the frontal eye fields in owl monkeys. *J. Comp. Neurol.* **247**, 297–325 (1986).
  38. Thiebaut de Schotten, M., Dell’Acqua, F., Valabregue, R. & Catani, M. Monkey to human comparative anatomy of the frontal lobe association tracts. *Cortex* **48**, 82–96 (2012).
  39. Cortico-cerebellar networks for visual attention and working memory. *Current Opinion in Psychology* **29**, 239–247 (2019).
  40. Badre, D. & D’Esposito, M. Is the rostro-caudal axis of the frontal lobe hierarchical? *Nat. Rev. Neurosci.* **10**, 659–669 (2009).
  41. Volle, E. *et al.* Specific Cerebral Networks for Maintenance and Response Organization within Working Memory as Evidenced by the ‘Double Delay/Double Response’ Paradigm. *Cerebral Cortex* vol. 15 1064–1074 (2005).
  42. Sammler, D., Kotz, S. A., Eckstein, K., Ott, D. V. M. & Friederici, A. D. Prosody meets syntax: the role of the corpus callosum. *Brain* **133**, 2643–2655 (2010).
  43. Agosta, F. *et al.* Language networks in semantic dementia. *Brain* **133**, 286–299 (2010).
  44. Baker, M. 1,500 scientists lift the lid on reproducibility. *Nature* **533**, 452–454 (2016).
  45. Van Essen, D. C. *et al.* The WU-Minn Human Connectome Project: an overview. *Neuroimage* **80**, 62–79 (2013).
  46. Sudlow, C. *et al.* UK Biobank: An Open Access Resource for Identifying the Causes of a Wide Range of Complex Diseases of Middle and Old Age. *PLoS Med.* **12**, e1001779 (2015).
  47. Di Martino, A. *et al.* The autism brain imaging data exchange: towards a large-scale evaluation of the intrinsic brain architecture in autism. *Mol. Psychiatry* **19**, 659–667

- (2013).
48. Maier-Hein, K. H. *et al.* The challenge of mapping the human connectome based on diffusion tractography. *Nat. Commun.* **8**, 1546 (2017).
  49. Vu, A. T. *et al.* High resolution whole brain diffusion imaging at 7 T for the Human Connectome Project. *Neuroimage* **122**, 318–331 (2015).
  50. Glasser, M. F. *et al.* A multi-modal parcellation of human cerebral cortex. *Nature* **536**, 171–178 (2016).
  51. Pushing spatial and temporal resolution for functional and diffusion MRI in the Human Connectome Project. *Neuroimage* **80**, 80–104 (2013).
  52. Glasser, M. F. *et al.* The minimal preprocessing pipelines for the Human Connectome Project. *Neuroimage* **80**, 105–124 (2013).
  53. Moeller, S. *et al.* Multiband multislice GE-EPI at 7 tesla, with 16-fold acceleration using partial parallel imaging with application to high spatial and temporal whole-brain fMRI. *Magn. Reson. Med.* **63**, 1144–1153 (2010).
  54. Caruyer, E., Lenglet, C., Sapiro, G. & Deriche, R. Design of multishell sampling schemes with uniform coverage in diffusion MRI. *Magn. Reson. Med.* **69**, 1534–1540 (2013).
  55. Sotiropoulos, S. N. *et al.* Advances in diffusion MRI acquisition and processing in the Human Connectome Project. *Neuroimage* **80**, 125–143 (2013).
  56. Andersson, J. L. R., Skare, S. & Ashburner, J. How to correct susceptibility distortions in spin-echo echo-planar images: application to diffusion tensor imaging. *Neuroimage* **20**, 870–888 (2003).
  57. Smith, S. M. *et al.* Advances in functional and structural MR image analysis and implementation as FSL. *Neuroimage* **23 Suppl 1**, S208–19 (2004).
  58. Dell’acqua, F. *et al.* A modified damped Richardson-Lucy algorithm to reduce isotropic background effects in spherical deconvolution. *Neuroimage* **49**, 1446–1458 (2010).
  59. Thiebaut de Schotten, M. *et al.* A lateralized brain network for visuospatial attention. *Nat. Neurosci.* **14**, 1245–1246 (2011).
  60. Dell’Acqua, F., Simmons, A., Williams, S. C. R. & Catani, M. Can spherical deconvolution provide more information than fiber orientations? Hindrance modulated orientational anisotropy, a true-tract specific index to characterize white matter diffusion. *Hum. Brain Mapp.* **34**, 2464–2483 (2013).
  61. Avants, B. B. *et al.* A reproducible evaluation of ANTs similarity metric performance in brain image registration. *Neuroimage* **54**, 2033–2044 (2011).
  62. Wassermann, D. *et al.* The white matter query language: a novel approach for describing human white matter anatomy. *Brain Structure and Function* vol. 221 4705–4721 (2016).
  63. Foulon, C. *et al.* Advanced lesion symptom mapping analyses and implementation as BCBtoolkit. *Gigascience* **7**, 37 (2018).
  64. Function in the human connectome: Task-fMRI and individual differences in behavior. *Neuroimage* **80**, 169–189 (2013).
  65. Temporal Autocorrelation in Univariate Linear Modeling of FMRI Data. *Neuroimage* **14**, 1370–1386 (2001).
  66. Multilevel linear modelling for FMRI group analysis using Bayesian inference. *Neuroimage* **21**, 1732–1747 (2004).
